# Supplementary material for: From east to west across the Palearctic: Phylogeography of the invasive lime leaf miner Phyllonorycter issikii (Lepidoptera: Gracillariidae) and discovery of a putative new cryptic species in East Asia
Source: PLOS journal article supplement (doi:10.1371/journal.pone.0171104), 2017-02-10

## Supplementary material

**S1 Fig. Distribution of normalized COI sequence divergence (K2P) for species (blue) against the genus (red) divergences at *Phyllonorycter issikii* and the putative *Phyllonorycter* sp. n.**

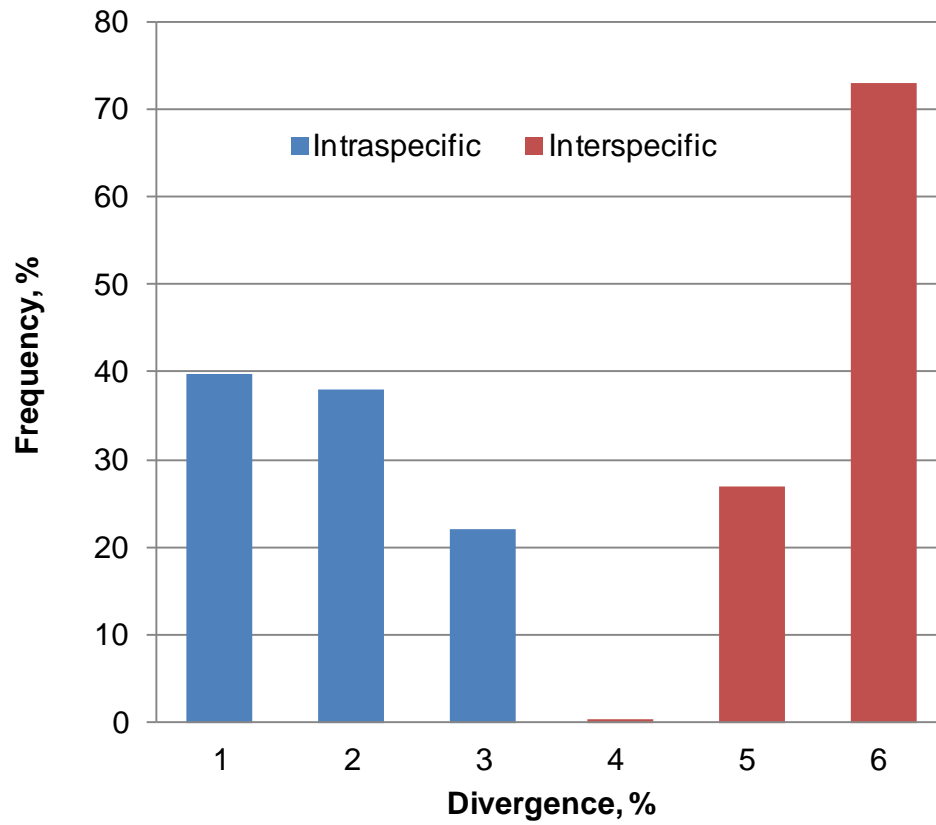

Supplement: S1 (10.1371/journal.pone.0171104.s001) [file journal.pone.0171104.s001]
